# Supplementary material for: Antimicrobial Activity of Selected Essential Oils against Staphylococcus aureus from Bovine Mastitis
Source: MDPI journal article supplement (doi:10.3390/dairy5010005), 2024-01-05
Supplement: s1 [file s1]

# Antimicrobial activity of selected essential oils against *Staphylococcus aureus* isolated from bovine mastitis

Karen Vanessa Munive Nuñez <sup>1</sup>, Anderson Clayton da Silva Abreu <sup>1</sup>, Jaqueline Milagres de Almeida <sup>1</sup>, Juliano Leonel Gonçalves <sup>2</sup>, Érika Bonsaglia <sup>3</sup>, Marcos Veiga dos Santos <sup>3</sup>, Nathália Cristina Cirone Silva <sup>1\*</sup>

<sup>1</sup> Department of Food Science and Nutrition, School of Food Engineering, University of Campinas (UNICAMP), Campinas, São Paulo, 13083-862, Brazil; kvmunive@gmail.com (K.V.M.N.); andersonclayton19@hotmail.com.br (A.C.S.A.); jaquelinemilagresdealmeida@hotmail.com (J.M.A.); ncirone@unicamp.br (N.C.C.S)

<sup>2</sup> Department of Large Animal Clinical Sciences, College of Veterinary Medicine, Michigan State University, East Lansing, MI 48824, USA; goncal25@msu.edu (J.L.G.)

<sup>3</sup> Department of Animal Nutrition and Production, School of Veterinary Medicine and Animal Sciences, University of São Paulo (USP), Pirassununga, São Paulo, 13635-900, Brazil; erikabonsaglia@gmail.com (E.B.) mveiga@usp.br (M.V.S.)

\* Correspondence: ncirone@unicamp.br; Tel.: +55-19-3251-4012

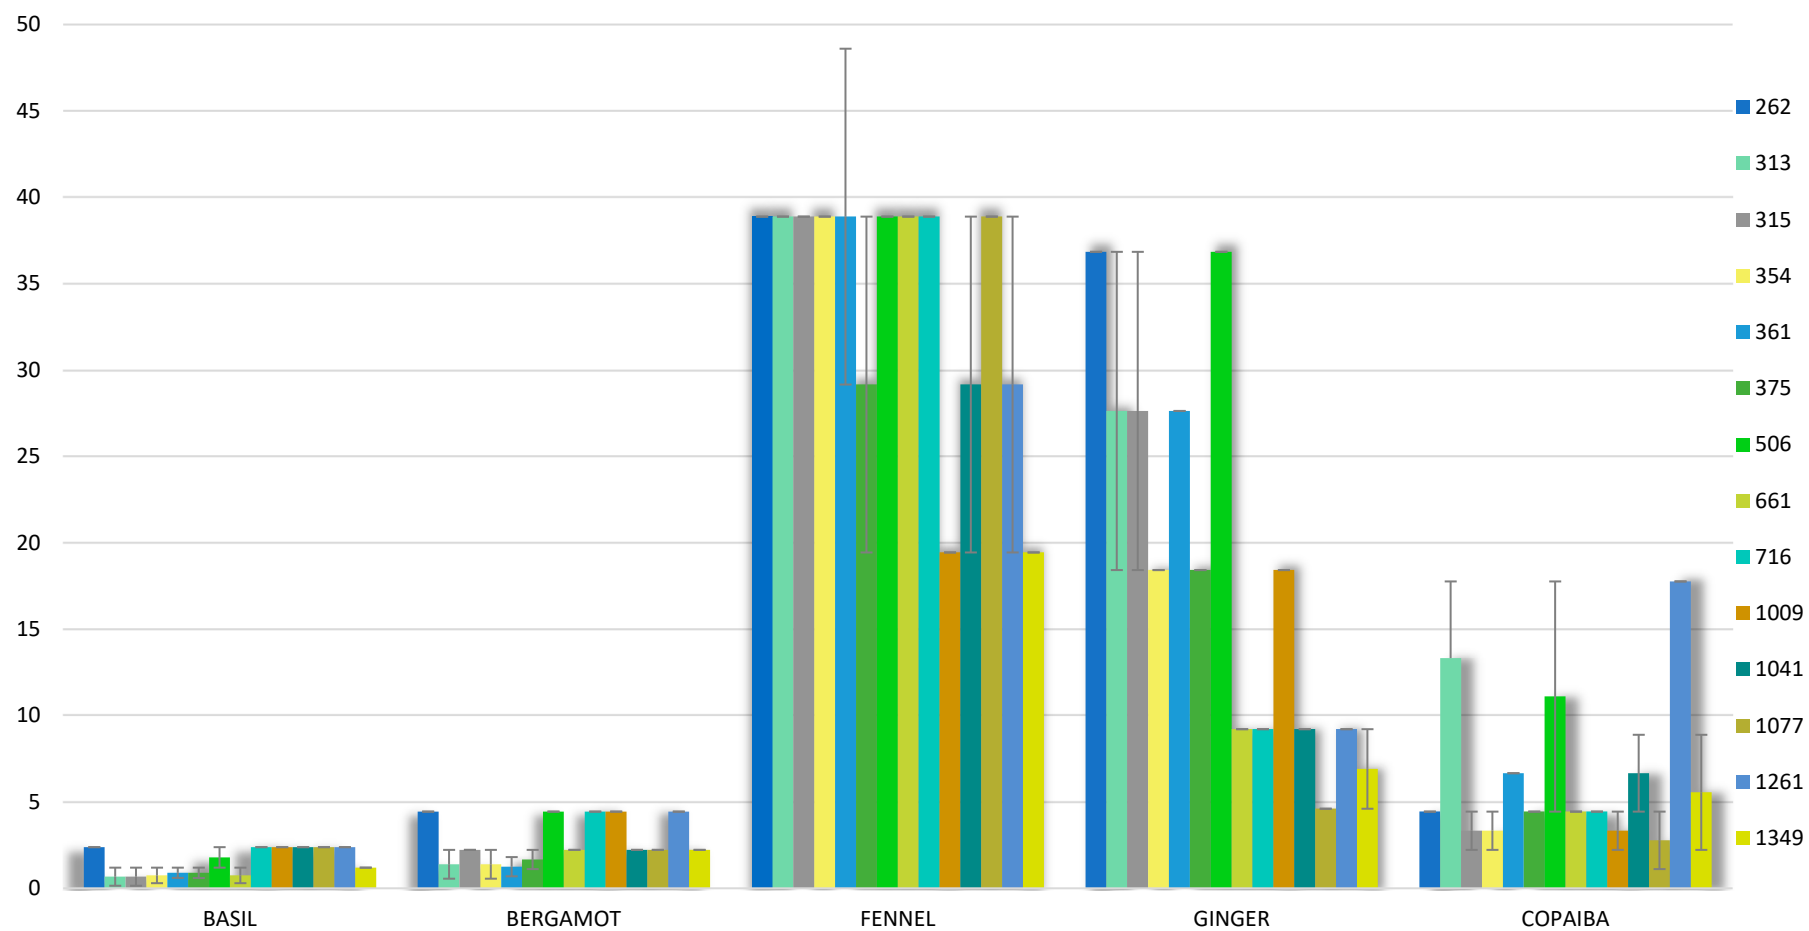

**Figure S1.** Minimum inhibitory concentration results of EOs tested against *S. aureus* strains.

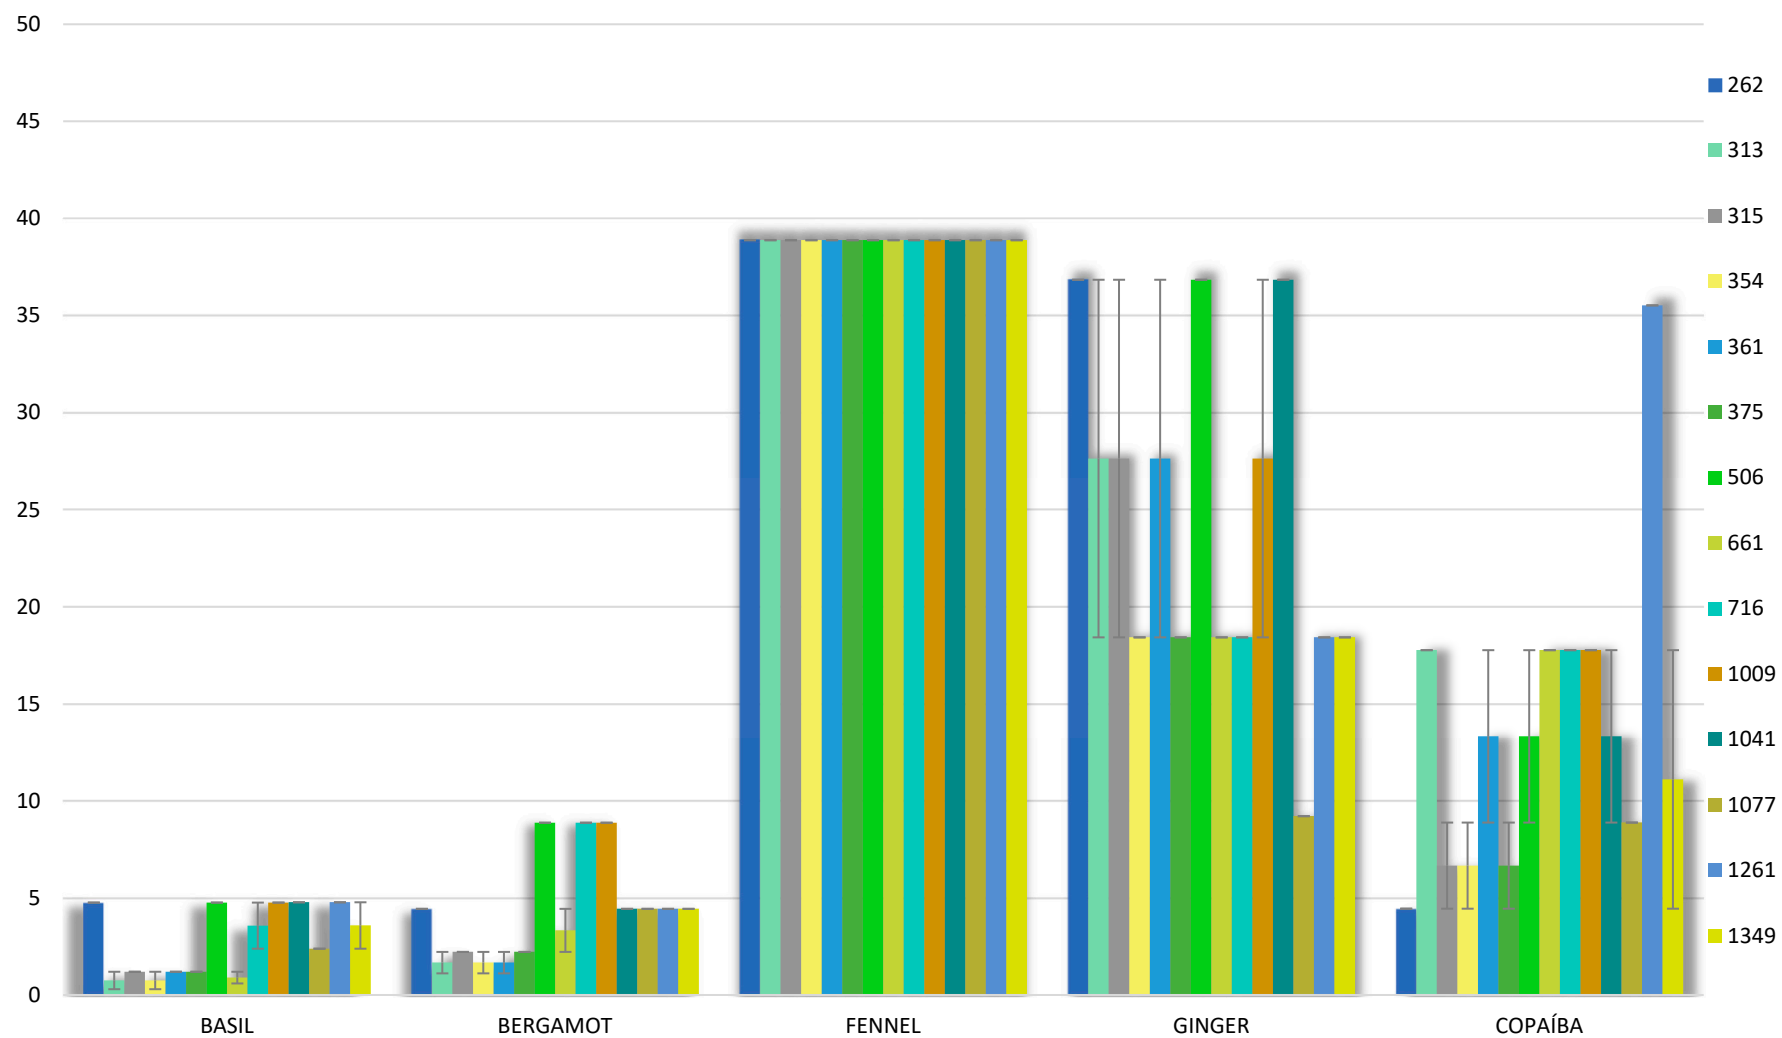

**Figure S2.** Minimum bactericidal concentration results of EOs tested against *S. aureus* strains.
